# Supplementary material for: Intimate partner violence and prescription of potentially addictive drugs: prospective cohort study of women in the Oslo Health Study
Source: PubMed Central journal article supplement — BMJ Open. 2012 Apr 5;2(2):e000614. doi: 10.1136/bmjopen-2011-000614 (PMC3323816; doi:10.1136/bmjopen-2011-000614), 2012-04-05
Supplement: bmjopen-2011-000614-s1.pdf [file bmjopen-2011-000614-s1.pdf]

# Research checklist

## STROBE Statement

The STROBE guidelines' items 1-22 for cohort studies (see below) were used to ensure the reporting of our paper "Intimate partner violence and prescription of potentially addictive drugs: prospective cohort study of women in the Oslo Health Study".

## Checklist of items that should be included in reports of cohort studies

|                          | Item No | Recommendation                                                                                                                                                                                                                                                                                                         |
|--------------------------|---------|------------------------------------------------------------------------------------------------------------------------------------------------------------------------------------------------------------------------------------------------------------------------------------------------------------------------|
| Title and abstract       | 1       | (a) Indicate the study's design with a commonly used term in the title or the abstract<br>(b) Provide in the abstract an informative and balanced summary of what was done and what was found                                                                                                                          |
| Introduction             |         |                                                                                                                                                                                                                                                                                                                        |
| Background/rationale     | 2       | Explain the scientific background and rationale for the investigation being reported                                                                                                                                                                                                                                   |
| Objectives               | 3       | State specific objectives, including any prespecified hypotheses                                                                                                                                                                                                                                                       |
| Methods                  |         |                                                                                                                                                                                                                                                                                                                        |
| Study design             | 4       | Present key elements of study design early in the paper                                                                                                                                                                                                                                                                |
| Setting                  | 5       | Describe the setting, locations, and relevant dates, including periods of recruitment, exposure, follow-up, and data collection                                                                                                                                                                                        |
| Participants             | 6       | (a) Give the eligibility criteria, and the sources and methods of selection of participants. Describe methods of follow-up<br>(b) For matched studies, give matching criteria and number of exposed and unexposed                                                                                                      |
| Variables                | 7       | Clearly define all outcomes, exposures, predictors, potential confounders, and effect modifiers. Give diagnostic criteria, if applicable                                                                                                                                                                               |
| Data sources/measurement | 8*      | For each variable of interest, give sources of data and details of methods of assessment (measurement). Describe comparability of assessment methods if there is more than one group                                                                                                                                   |
| Bias                     | 9       | Describe any efforts to address potential sources of bias                                                                                                                                                                                                                                                              |
| Study size               | 10      | Explain how the study size was arrived at                                                                                                                                                                                                                                                                              |
| Quantitative variables   | 11      | Explain how quantitative variables were handled in the analyses. If applicable, describe which groupings were chosen and why                                                                                                                                                                                           |
| Statistical methods      | 12      | (a) Describe all statistical methods, including those used to control for confounding<br>(b) Describe any methods used to examine subgroups and interactions<br>(c) Explain how missing data were addressed<br>(d) If applicable, explain how loss to follow-up was addressed<br>(e) Describe any sensitivity analyses |
| Results                  |         |                                                                                                                                                                                                                                                                                                                        |
| Participants             | 13*     | (a) Report numbers of individuals at each stage of study—eg numbers potentially eligible, examined for eligibility, confirmed eligible, included in the study, completing follow-up, and analysed<br>(b) Give reasons for non-participation at each stage<br>(c) Consider use of a flow diagram                        |

|                   |     |                                                                                                                                                                                                              |
|-------------------|-----|--------------------------------------------------------------------------------------------------------------------------------------------------------------------------------------------------------------|
| Descriptive data  | 14* | (a) Give characteristics of study participants (eg demographic, clinical, social) and information on exposures and potential confounders                                                                     |
|                   |     | (b) Indicate number of participants with missing data for each variable of interest                                                                                                                          |
|                   |     | (c) Summarise follow-up time (eg, average and total amount)                                                                                                                                                  |
| Outcome data      | 15* | Report numbers of outcome events or summary measures over time                                                                                                                                               |
| Main results      | 16  | (a) Give unadjusted estimates and, if applicable, confounder-adjusted estimates and their precision (eg, 95% confidence interval). Make clear which confounders were adjusted for and why they were included |
|                   |     | (b) Report category boundaries when continuous variables were categorized                                                                                                                                    |
|                   |     | (c) If relevant, consider translating estimates of relative risk into absolute risk for a meaningful time period                                                                                             |
| Other analyses    | 17  | Report other analyses done—eg analyses of subgroups and interactions, and sensitivity analyses                                                                                                               |
| Discussion        |     |                                                                                                                                                                                                              |
| Key results       | 18  | Summarise key results with reference to study objectives                                                                                                                                                     |
| Limitations       | 19  | Discuss limitations of the study, taking into account sources of potential bias or imprecision. Discuss both direction and magnitude of any potential bias                                                   |
| Interpretation    | 20  | Give a cautious overall interpretation of results considering objectives, limitations, multiplicity of analyses, results from similar studies, and other relevant evidence                                   |
| Generalisability  | 21  | Discuss the generalisability (external validity) of the study results                                                                                                                                        |
| Other information |     |                                                                                                                                                                                                              |
| Funding           | 22  | Give the source of funding and the role of the funders for the present study and, if applicable, for the original study on which the present article is based                                                |

\*Give information separately for exposed and unexposed groups.
